# Supplementary material
Source: Royal Society of Chemistry journal article supplement (doi:10.1039/d5ta10567f)
Supplement: d5ta10567f2.pdf [file d5ta10567f2.pdf]

## Supporting Information

# Hierarchical hollow $\text{MnTe}_2/\text{CoTe}_2$ composite nanospheres assembled from porous nanosheets: Synergistic structural engineering for high-performance hybrid supercapacitors

Akbar Mohammadi Zardkhoshoui<sup>1\*</sup>, Erfan Behzadi,<sup>2</sup> Mohammad Ali Saghafizadeh,<sup>2</sup> and Saied Saeed Hosseiny Davarani<sup>2\*</sup>

<sup>1</sup>Department of Chemical Technologies, Iranian Research Organization for Science and Technology (IROST), Tehran 3313193685, Iran.

<sup>2</sup>Department of Chemistry, Shahid Beheshti University, G. C., 1983963113, Evin, Tehran, Iran.

Corresponding authors: \*<sup>1</sup>Tel: +98 21 56276283; Fax: +98 21 56276265; E-mail: A\_mohammadi@irost.ir (A. Mohammadi Zardkhoshoui) and \*<sup>2</sup>Tel: +98 21 22431661; Fax: +98 21 22431661; E-mail: ss-hosseiny@sbu.ac.ir (S.S.H. Davarani).

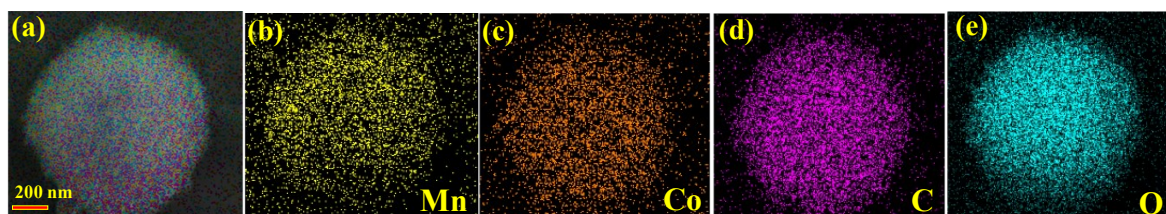

**Fig. S1** FESEM mapping images of the MnCo-LDH.

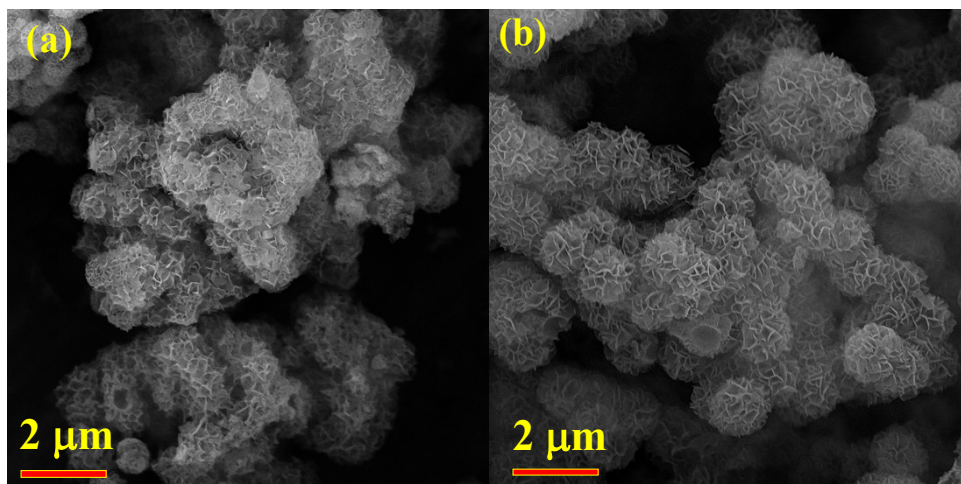

Fig. S2 (a) FESEM image of the MnTe<sub>2</sub>, (a) FESEM image of the CoTe<sub>2</sub>

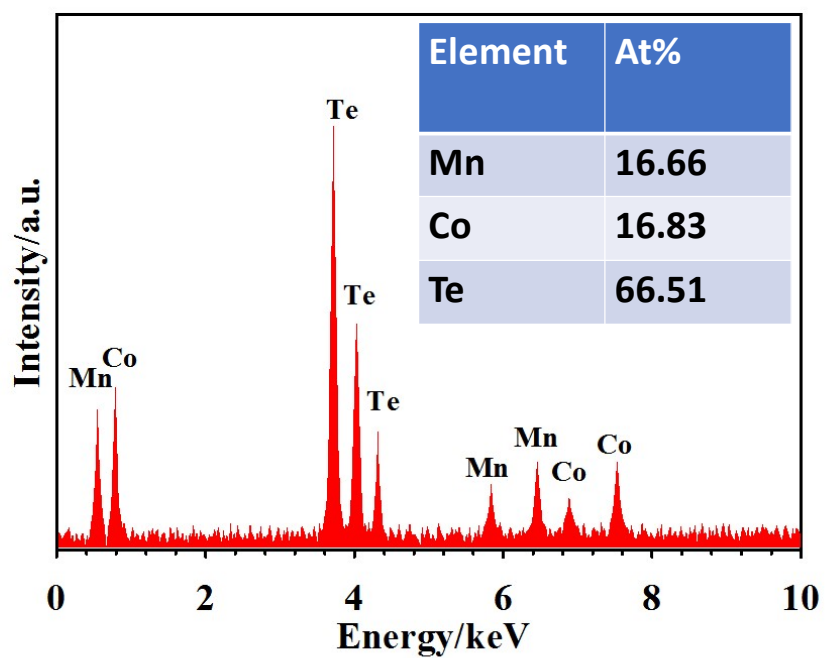

Fig. S3 EDS pattern of the MCT-500.

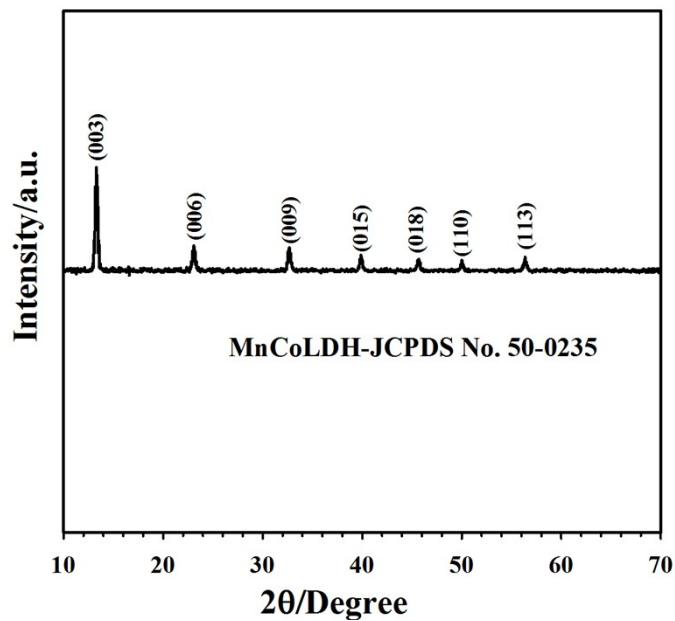

Fig. S4 XRD pattern of the MnCo-LDH.

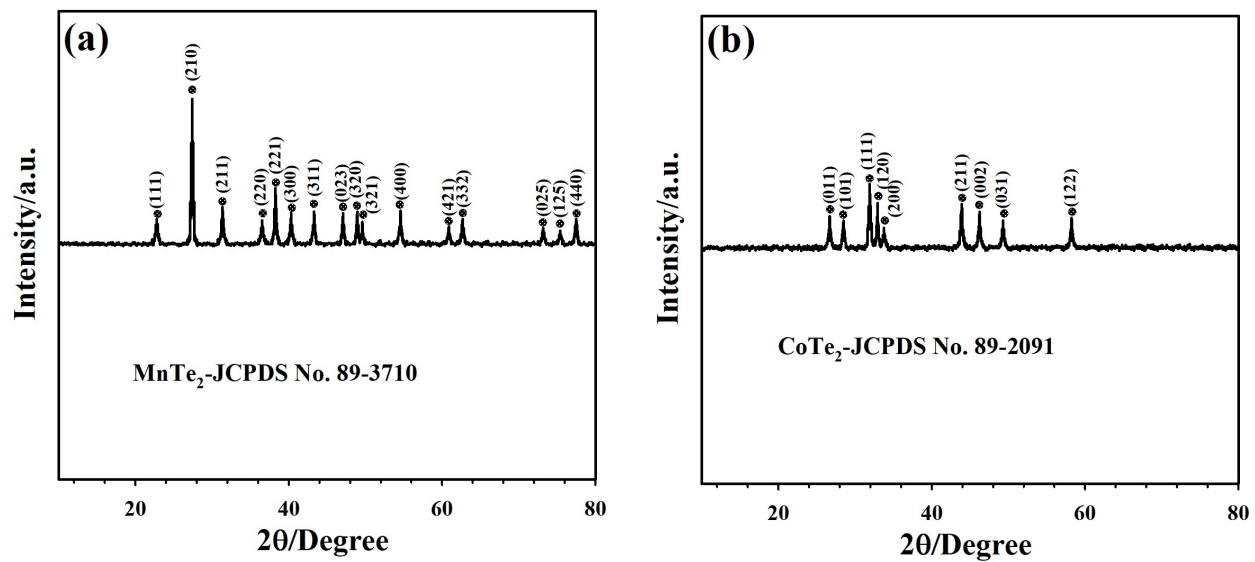

Fig. S5 (a) XRD pattern of the MnTe<sub>2</sub>, (b) (a) XRD pattern of the CoTe<sub>2</sub>.

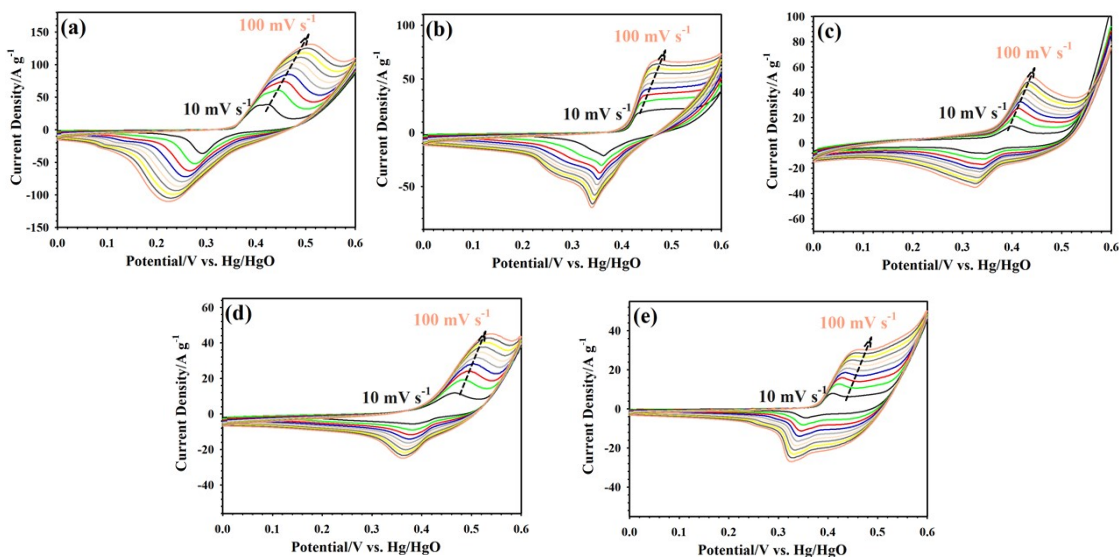

**Fig. S6** (a) CV curves of the MCT-300 from 10 to 100  $\text{mV s}^{-1}$ , (b) CV curves of the MCT-150 from 10 to 100  $\text{mV s}^{-1}$ , (c) CV curves of the MnCo-LDH from 10 to 100  $\text{mV s}^{-1}$ , (d) CV curves of the  $\text{CoTe}_2$  from 10 to 100  $\text{mV s}^{-1}$ , (e) CV curves of the  $\text{MnTe}_2$  from 10 to 100  $\text{mV s}^{-1}$ .

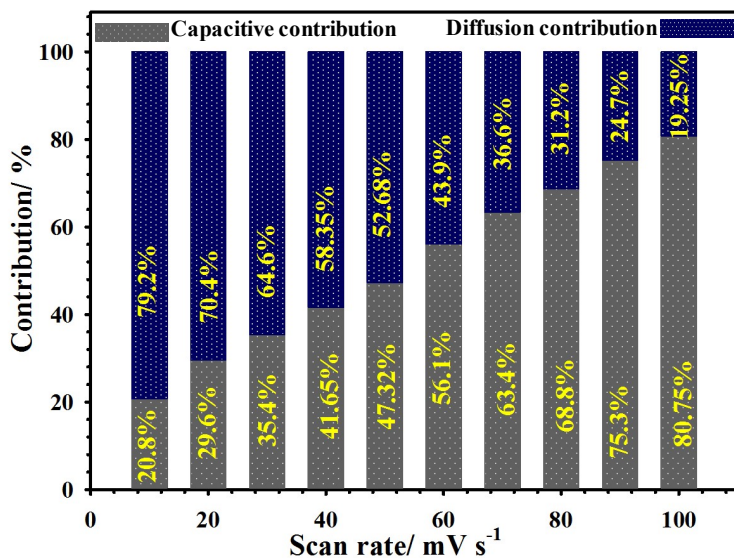

**Fig. S7** Relative contribution of the capacitive and diffusion-controlled charge storage at various sweep speeds for MCT-500 based-electrode.

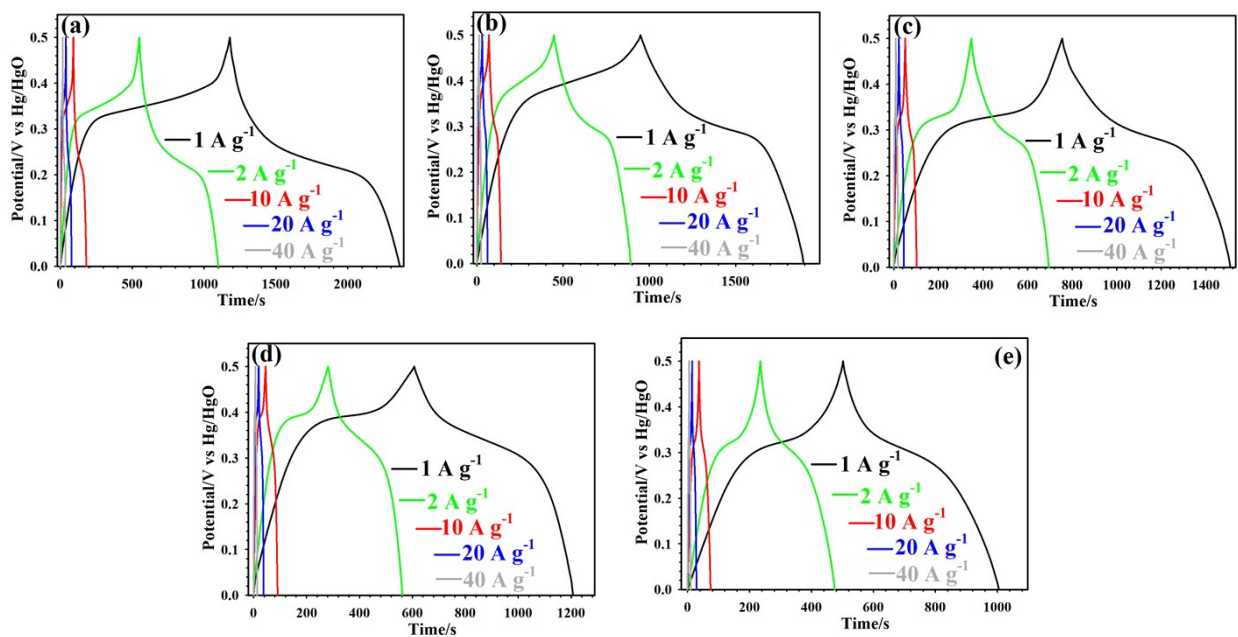

**Fig. S8** (a) GCD curves of the MCT-300 from 1 to 40  $A g^{-1}$ , (b) GCD curves of the MCT-150 from 1 to 40  $A g^{-1}$ , (c) GCD curves of the MnCo-LDH from 1 to 40  $A g^{-1}$ , (d) GCD curves of the  $CoTe_2$  from 1 to 40  $A g^{-1}$ , (e) GCD curves of the  $MnTe_2$  from 1 to 40  $A g^{-1}$ .

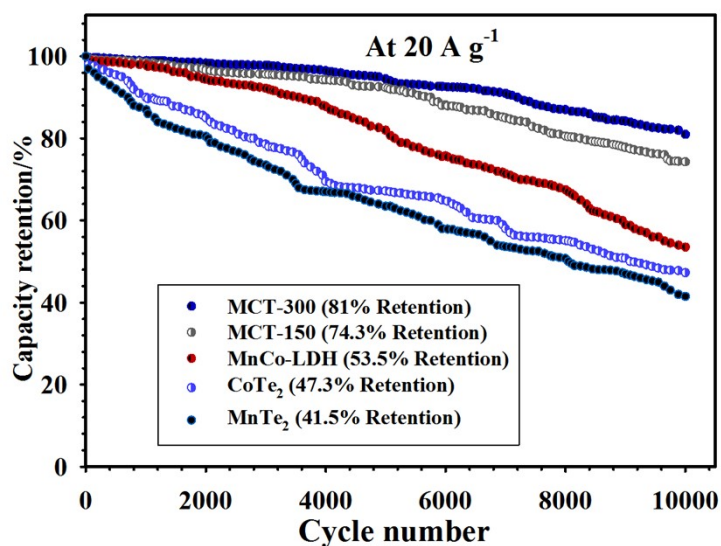

**Fig. S9** Longevity of the MCT-300, MCT-150, MnCo-LDH,  $CoTe_2$ , and  $MnTe_2$  electrodes at 20  $A g^{-1}$ .

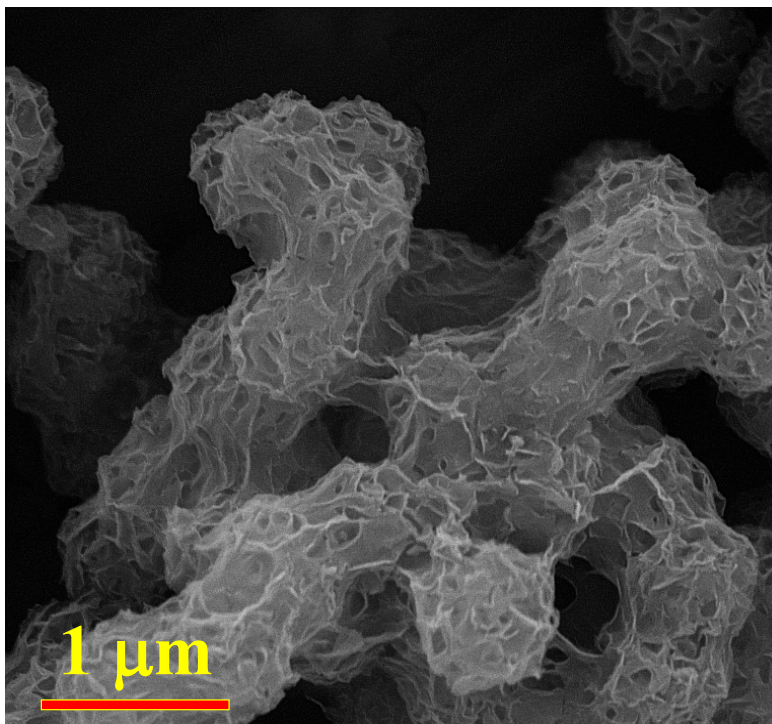

**Fig. S10** FESEM image of the MCT-500 after 10000 cycles.

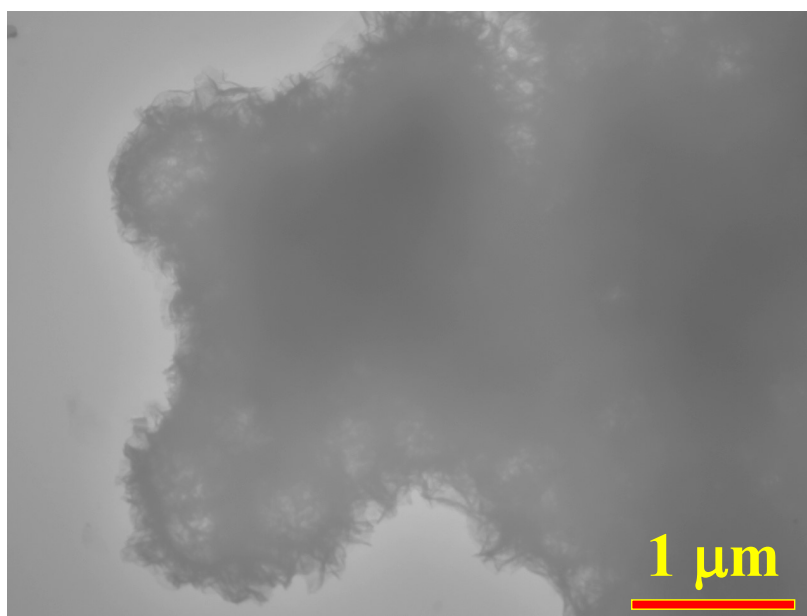

**Fig. S11** TEM image of the MCT-500 after 10000 cycles.

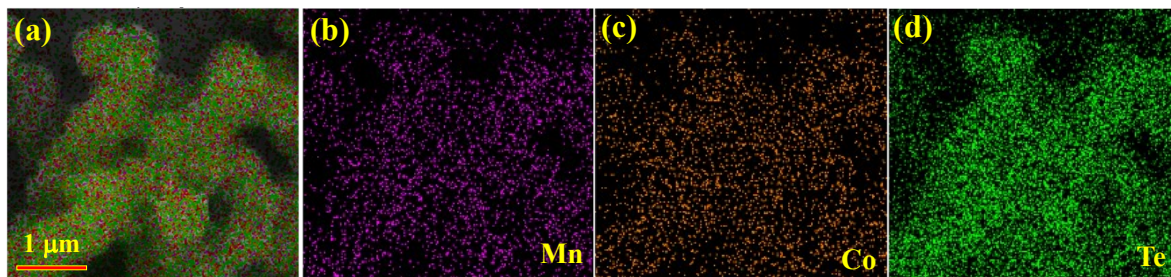

Fig. S12 FESEM mapping images of the MCT-500 after 10000 cycles.

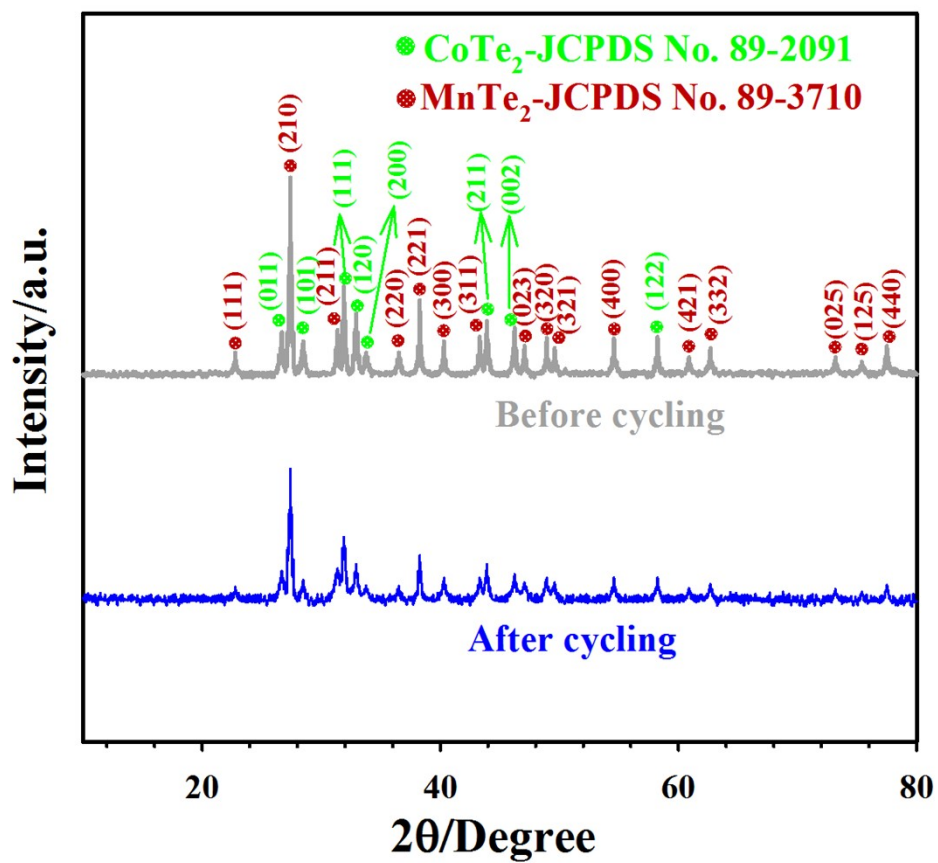

Fig. S13 XRD patterns of the MCT-500 before and after 10000 cycles.

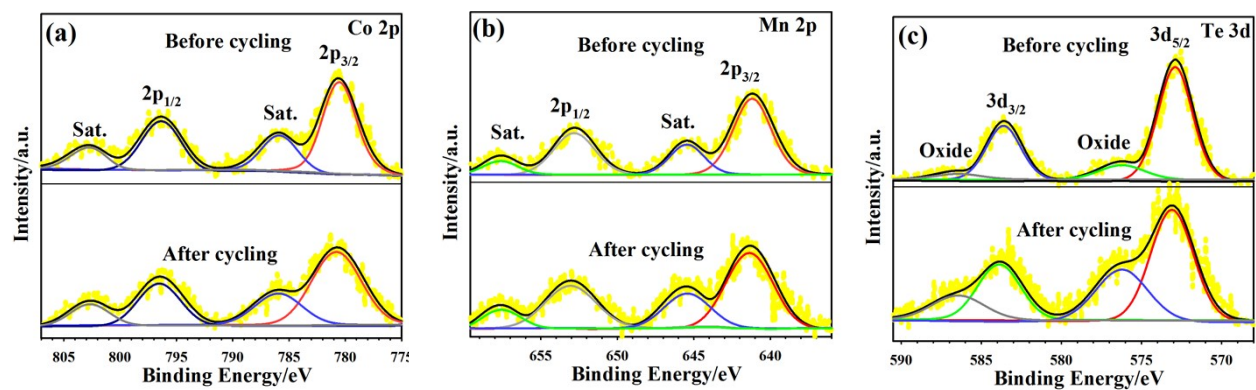

**Fig. S14** (a) High-resolution Co 2p XPS patterns of MCT-500 before and after 10000 cycles. (b) High-resolution Mn 2p XPS patterns of MCT-500 before and after 10000 cycles. (c) High-resolution Te 3d XPS patterns of MCT-500 before and after 10000 cycles.

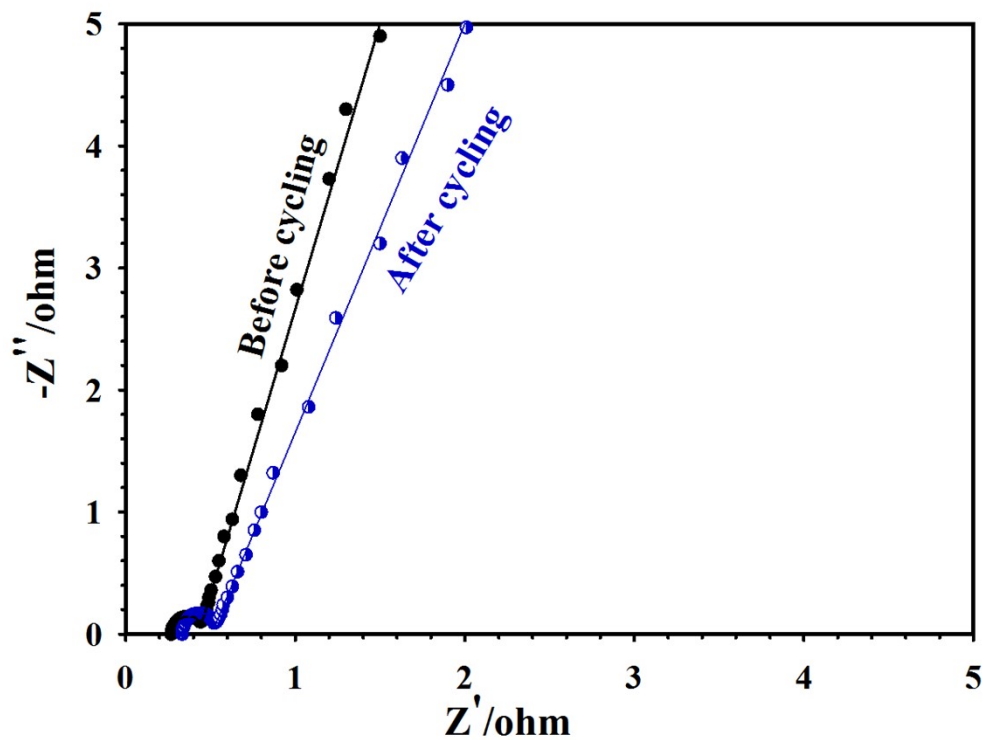

**Fig. S15** EIS curves of the MCT-500 before and after 10000 cycles.

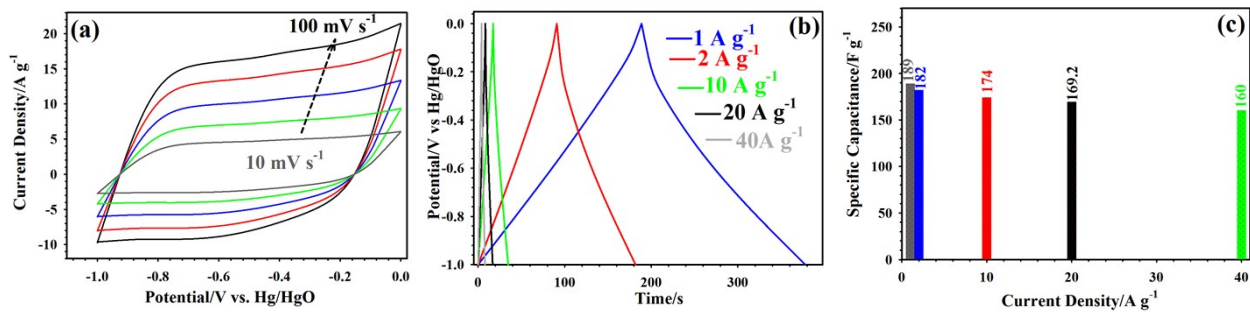

**Fig. S16** (a) CV curves of the AC (negative electrode) from 10 to 50 mV s<sup>-1</sup>. (b) GCD plots of the AC (negative electrode) from 1 to 40 A g<sup>-1</sup>. (c) Rate capability of the AC electrode (negative electrode).

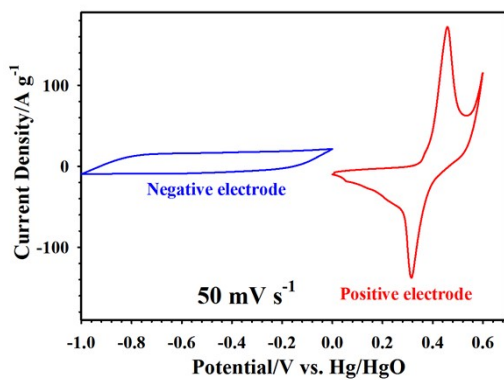

**Fig S17** CV plots of AC (negative electrode) and MCT-500 (positive electrode) at 50 mV s<sup>-1</sup> in three-electrode cell.

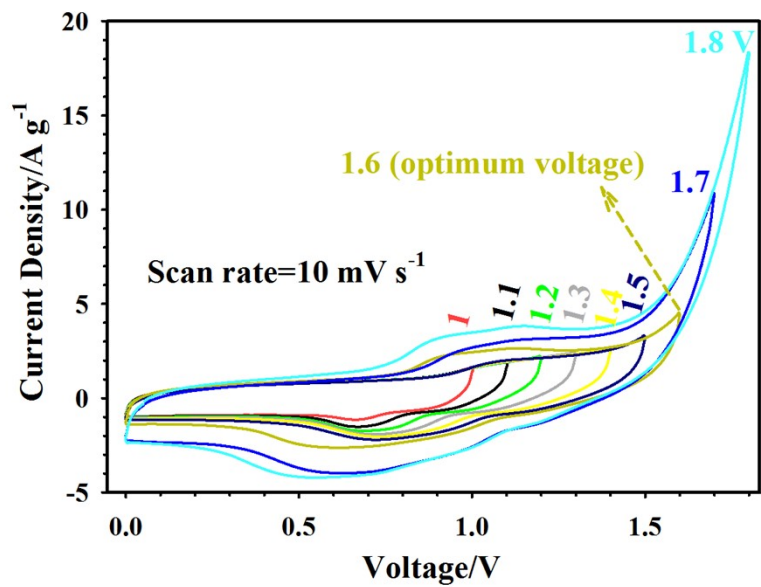

**Fig S18** CV plots of the AC//MCT-500 at various potential window at  $10 \text{ mV s}^{-1}$  from 1.0 to 1.8 V.

**Table S1.** Comparison of the electrochemical performance of the MCT-500 with other previously reported

| Composition                                                        | Capacity (C/g)                | Cycles, retention  | Rate capability                | ED (Wh kg <sup>-1</sup> ) | Reference  |
|--------------------------------------------------------------------|-------------------------------|--------------------|--------------------------------|---------------------------|------------|
| NiTe/ZIF-67                                                        | 760.5 at 1 A g <sup>-1</sup>  | 5000, 93.5% (3 E)  | -                              | 43.5                      | 1          |
| NiMnTe                                                             | 652.5 at 1 A g <sup>-1</sup>  | 10000, 82% (3 E)   |                                | 47.8                      | 2          |
| rGO-CCSe                                                           | 724 at 1 A g <sup>-1</sup>    | 6000, 91.5%        | 71% at 60 A g <sup>-1</sup>    | 57.8                      | 3          |
| CuSe@MnSe                                                          | 635.32 at 1 A g <sup>-1</sup> | 7000, 91.62%       | 60.3% at 30 A g <sup>-1</sup>  | 19.4                      | 4          |
| CoMnSe@NF                                                          | 579.6 at 1 A g <sup>-1</sup>  | 8000, 91.8%        | 61.83% at 20 A g <sup>-1</sup> | 55.1                      | 5          |
| 3DG/ZnSe-SnSe <sub>2</sub>                                         | 833.36 at 1 A g <sup>-1</sup> | 3000, 90.1%        | 72.37% at 10 A g <sup>-1</sup> | 32.4                      | 6          |
| CoMnSe@NF                                                          | 519 at 1 A g <sup>-1</sup>    | 5000, 87.07%       |                                | 35.47                     | 7          |
| N-CQDs/Ni-Co-Se                                                    | 543.96 at 1 A g <sup>-1</sup> | 5000, 94%          | 70.1 % at 50 A g <sup>-1</sup> | 41.1                      | 8          |
| (Ni,Co)Se <sub>2</sub> /NiCo-LDH                                   | 612 at 1 A g <sup>-1</sup>    | 3000, 89%          | 71 % at 20 A g <sup>-1</sup>   | 39                        | 9          |
| E <sub>3</sub> /MnSe@Ti <sub>3</sub> C <sub>2</sub> T <sub>x</sub> | 612 at 1 A g <sup>-1</sup>    | 4000, 90.77%       | 51.7 % at 10 A g <sup>-1</sup> | 28.68                     | 10         |
| MCT-500                                                            | 1354 at 1 A g <sup>-1</sup>   | 10000, 89.2% (3 E) | 68.25% at 40 A g <sup>-1</sup> | 64.88                     | This study |

materials.

## References

1 K.L. Meghanathan, M. Parthibavarman, V. Sharmila and J.R. Joshua, *J. Energy Storage*, 2023, **72**, 108665.

- 2 P.-Y. Tai, M. Sakthivel, L.-Y. Lin and K.-C. Ho, *J. Energy Storage*, 2025, **119**, 116362.
- 3 S.E. Moosavifard, A. Mohammadi, M. Ebrahimnejad Darzi, A. Kariman, M.M. Abdi and G. Karimi, *Chem. Eng. J.*, 2021, **415**, 128662.
- 4 G. Tang, X. Zhang, B. Tian, P. Guo, J. Liang and W. Wu, *Chem. Eng. J.*, 2023, **471**, 144590.
- 5 C. Miao, P. Xu, J. Zhao, K. Zhu, K. Cheng, K. Ye, J. Yan, D. Cao, G. Wang and X. Zhang, *ACS Appl. Energy Mater.*, 2019, **2**, 3595–3604.
- 6 T. Zhao, G. Feng, L. Zhou, X. Wang, X. Li, F. Jiang, H. Li, Y. Liu, Q. Yu, H. Cao, Y. Xu and Y. Zhu, *ACS Appl. Nano Mater.*, 2024, **7**, 13434–13446.
- 7 A.D. Savariraj, L. Kulandaivel, J.W. Park, P. Sivakumar, R. Manikandan, B.C. Kim and H. Jung, *ACS Appl. Energy Mater.*, 2024, **7**, 735–748.
- 8 Z. Lu, Z. Hu, L. Xiao, Y. Xie, L. Li, N. Xi, W. Chen, J. Xiao and Y. Zhu, *Chem. Eng. J.*, 2022, **450**, 138347.
- 9 X. Li, H. Wu, C. Guan, A.M. Elshahawy, Y. Dong, S.J. Pennycook and J. Wang, *Small*, 2019, **15**, 1803895.
- 10 S. Li, Q. Song, C. Fang, Y. Lu, X. Ding, T. Liu, J. Zhang and F.J. Xu, *Small*, 2025, **21**, 2409130.
